# Supplementary material
Source: publisher site journal article supplement (https://www.dovepress.com/article/407650)
Supplement: Supplementary file 1 [file get_supplementary_file.php]

**Legends**

**Table S1** Clinical characteristics of Ps and leprosy patients for RNA-seq.

| **Group** | **Age (yr)** | **Gender** | **Ethnic group** | **Nationality** | **R&J classification[29]** | **Bacillary index** | **Anatomical site** | **Lesion size** |
| --- | --- | --- | --- | --- | --- | --- | --- | --- |
| Ps 1 | 46 | M | Asian | China | / | / | Left waist | 6mm×2mm |
| Ps 2 | 34 | M | Asian | China | / | / | Left waist | 6mm×4mm |
| Ps 3 | 24 | M | Asian | China | / | / | Right back | 6mm×4mm |
| Ps 4 | 38 | M | Asian | China | / | / | Right abdomen | 6mm×4mm |
| Ps 5 | 58 | F | Asian | China | / | / | Right thigh | 9mm×4mm |
| Ps 6 | 23 | F | Asian | China | / | / | Left abdomen | 9mm×4mm |
| Ps 7 | 36 | F | Asian | China | / | / | Right abdomen | 6mm×4mm |
| Ps 8 | 29 | M | Asian | China | / | / | Left leg | 9mm×4mm |
| Ps 9 | 24 | M | Asian | China | / | / | Right hip | 12mm×4mm |
| Ps 10 | 33 | M | Asian | China | / | / | Right back | 6mm×4mm |
| Ps 11 | 54 | M | Asian | China | / | / | Right hip | 9mm×4mm |
| Ps 12 | 35 | M | Asian | China | / | / | Left waist | 9mm×4mm |
| Ps 13 | 41 | M | Asian | China | / | / | Left waist | 9mm×4mm |
| Ps 14 | 30 | M | Asian | China | / | / | Back | 12mm×4mm |
| Ps 15 | 40 | F | Asian | China | / | / | Left waist | 9mm×4mm |
| Ps 16 | 43 | M | Asian | China | / | / | Right forearm | 9mm×3mm |
| Ps 17 | 30 | F | Asian | China | / | / | Left thigh | 9mm×3mm |
| Ps 18 | 46 | F | Asian | China | / | / | Left leg | 9mm×3mm |
| Ps 19 | 27 | F | Asian | China | / | / | Left waist | 6mm×4mm |
| Ps 20 | 39 | F | Asian | China | / | / | Waist | 9mm×3mm |
| L-lep 1 | 46 | F | Asian | China | BL | 6+ | Left waist | 6mm×2mm |
| L-lep 2 | 34 | F | Asian | China | BL | 4+ | Left abdomen | 6mm×4mm |
| L-lep 3 | 54 | M | Asian | China | LL | 4+ | Right neck | 6mm×4mm |
| L-lep 4 | 38 | M | Asian | China | LL | 6+ | Right abdomen | 6mm×4mm |
| L-lep 5 | 58 | M | Asian | China | BL | 5+ | Right thigh | 9mm×4mm |
| T-lep 1 | 23 | M | Asian | China | TT | ± | Left waist | 9mm×4mm |
| T-lep 2 | 80 | F | Asian | China | TT | ± | Left thigh | 9mm×4mm |
| T-lep 3 | 31 | F | Asian | China | BB | ± | Right abdomen | 6mm×4mm |
| T-lep 4 | 29 | M | Asian | China | BB | negative | Right hand | 9mm×4mm |
| T-lep 5 | 36 | F | Asian | China | TT | negative | Right waist | 6mm×4mm |
| Ps, psoriasis; L-lep, lepromatous leprosy; T-lep, tuberculoid leprosy; BL, borderline lepromatous; LL, lepromatous leprosy; TT, Tuberculoid leprosy; BB, borderline borderline; M, male; F, female; /, no data; yr, year. | | | | | | | | |

**Table S2** The following primers were used for qRT-PCR

| **Primer** | **5' to 3'** |
| --- | --- |
| *β-actin* forward primer | CACCATTGGCAATGAGCGGTTC |
| *β-actin* reverse primer | AGGTCTTTGCGGATGTCCACGT |
| *IL-19* forward primer | CACCAATGCCACCAGAGTCA |
| *IL-19* reverse primer | GGGATTTAATGGCAGCAGCG |
| *IL-20* forward primer | ACCAGAAGCAGCAGCCTTTC |
| *IL-20* reverse primer | CACAGGTCGTGGCTCCTTTA |
| *IL-36A* forward primer | CCCAAGTGCAGTAGAAGCCA |
| *IL-36A* reverse primer | GGTCACCAGACTTTCCAGCA |
| *IL-36G* forward primer | ACTGACCTTGGAAGCTGCTG |
| *IL-36G* reverse primer | AGGGTCCACACTTGCTGATT |
| *IL-22* forward primer | TGTGCAAAAGCTGAAGGACAC |
| *IL-22* reverse primer | GCAGGGAAAGGGGGTTAGTT |
| *IL-17A* forward primer | CTGTCCCCATCCAGCAAGAG |
| *IL-17A* reverse primer | AGGCCACATGGTGGACAATC |
| *IL-17F* forward primer | GGTTCATCACGGGCATCT |
| *IL-17F* reverse primer | CTCCACCATCTCCTGCTTCT |
| *LCN2* forward primer | CTCCAAATCTCTGGGCCTCC |
| *LCN2* reverse primer | CGGCACCTGTGCACTCA |
| *CLEC4E* forward primer | CCTGTTTCATCACCAGATGTGT |
| *CLEC4E* reverse primer | GCCCAGGAAATGGTGTCAGTA |
| *TREM2* forward primer | GGAGCCTCTTGGAAGGAGAAAT |
| *TREM2* reverse primer | CTGGCAGAGTTTGGAGCTGATA |
| *SPP1* forward primer | CTGAACGCGCCTTCTGATTG |
| *SPP1* reverse primer | GGGTTTCAGCACTCTGGTCA |
| *ITGAX* forward primer | CTCCTCCTGTTCACAGCCTT |
| *ITGAX* reverse primer | GTGCTGTAGCCACACTGGTA |
| *TNF-α* forward primer | CTGGGGCCTACAGCTTTGA |
| *TNF-α* reverse primer | GGCCTAAGGTCCACTTGTGT |
